# Supplementary material for: Development of a Dendrimeric Peptide-Based Approach for the Differentiation of Animals Vaccinated with FlagT4G against Classical Swine Fever from Infected Pigs
Source: MDPI journal article supplement (doi:10.3390/v13101980), 2021-10-02
Supplement: s1 [file s1]

**Table S1.** CSFV infection status and comparative ELISA results of the samples employed for validation of the FlagDIVA assay

| Sample ID | CSFV Infection strain (Genotype) | Days after infection | FlagDIVA ELISA result | Optical density value (FlagDIVA) | E2-antibody ELISA result | Blocking % |
|-----------|----------------------------------|----------------------|-----------------------|----------------------------------|--------------------------|------------|
| 1         | Non-infected                     | No                   | Negative              | 0,33                             | Negative                 | 0,00       |
| 2         | Catalonia01 (2,3)                | 8                    | Negative              | 0,19                             | Negative                 | 15,23      |
| 3         | Pinar del Rio (1,4)              | 21                   | Positive              | 0,49                             | Negative                 | 26,21      |
| 4         | Catalonia01 (2,3)                | 3                    | Negative              | 0,09                             | Negative                 | 5,86       |
| 5         | Catalonia01 (2,3)                | 14                   | Negative              | 0,25                             | Negative                 | 15,19      |
| 6         | Catalonia01 (2,3)                | 17                   | Negative              | 0,30                             | Negative                 | 29,55      |
| 7         | Non-infected                     | No                   | Negative              | 0,18                             | Negative                 | 0,00       |
| 8         | Catalonia01 (2,3)                | 8                    | Negative              | 0,29                             | Negative                 | 18,30      |
| 9         | Catalonia01 (2,3)                | 3                    | Negative              | 0,20                             | Negative                 | 14,87      |
| 10        | Catalonia01 (2,3)                | 8                    | Negative              | 0,25                             | Negative                 | 22,46      |
| 11        | Catalonia01 (2,3)                | 3                    | Negative              | 0,23                             | Negative                 | 14,73      |
| 12        | Catalonia01 (2,3)                | 17                   | Negative              | 0,31                             | Negative                 | 29,07      |
| 13        | Non-infected                     | No                   | Negative              | 0,16                             | Negative                 | 0,00       |
| 14        | Catalonia01 (2,3)                | 8                    | Negative              | 0,14                             | Negative                 | 15,60      |
| 15        | Catalonia01 (2,3)                | 3                    | Negative              | 0,09                             | Negative                 | 12,58      |
| 16        | Margarita (1,4)                  | 10                   | Negative              | 0,39                             | Negative                 | 0,00       |
| 17        | Non-infected                     | No                   | Negative              | 0,32                             | Negative                 | 0,00       |
| 18        | Margarita (1,4)                  | 18                   | Negative              | 0,21                             | Negative                 | 18,80      |
| 19        | Catalonia01 (2,3)                | 3                    | Negative              | 0,13                             | Negative                 | 10,16      |
| 20        | Catalonia01 (2,3)                | 8                    | Negative              | 0,22                             | Negative                 | 24,15      |
| 21        | Margarita (1,4)                  | 10                   | Positive              | 0,51                             | Negative                 | 0,00       |
| 22        | Non-infected                     | No                   | Negative              | 0,15                             | Negative                 | 0,00       |
| 23        | Catalonia01 (2,3)                | 3                    | Negative              | 0,17                             | Negative                 | 4,80       |
| 24        | Catalonia01 (2,3)                | 8                    | Negative              | 0,17                             | Negative                 | 14,23      |
| 25        | Non-infected                     | No                   | Negative              | 0,19                             | Negative                 | 0,00       |
| 26        | Non-infected                     | No                   | Negative              | 0,14                             | Negative                 | 0,00       |
| 27        | Margarita (1,4)                  | 13                   | Negative              | 0,17                             | Negative                 | 0,00       |
| 28        | Catalonia01 (2,3)                | 8                    | Negative              | 0,21                             | Negative                 | 11,02      |
| 29        | Catalonia01 (2,3)                | 3                    | Negative              | 0,16                             | Negative                 | 0,00       |
| 30        | Catalonia01 (2,3)                | 14                   | Negative              | 0,17                             | Negative                 | 22,06      |
| 31        | Non-infected                     | No                   | Negative              | 0,15                             | Negative                 | 0,00       |
| 32        | Non-infected                     | No                   | Negative              | 0,20                             | Negative                 | 0,00       |
| 33        | Margarita (1,4)                  | 13                   | Negative              | 0,14                             | Negative                 | 0,00       |
| 34        | Pinar del Rio (1,4)              | 21                   | Positive              | 0,49                             | Negative                 | 23,66      |
| 35        | Non-infected                     | No                   | Negative              | 0,12                             | Negative                 | 0,00       |
| 36        | Margarita (1,4)                  | 13                   | Negative              | 0,28                             | Negative                 | 0,00       |
| 37        | Pinar del Rio (1,4)              | 21                   | Negative              | 0,36                             | Negative                 | 11,78      |
| 38        | Non-infected                     | No                   | Negative              | 0,13                             | Negative                 | 0,00       |
| 39        | Non-infected                     | No                   | Negative              | 0,22                             | Negative                 | 0,00       |
| 40        | Non-infected                     | No                   | Negative              | 0,15                             | Negative                 | 0,00       |
| 41        | Non-infected                     | No                   | Negative              | 0,10                             | Negative                 | 0,00       |
| 42        | Margarita (1,4)                  | 6                    | Positive              | 0,69                             | Negative                 | 0,00       |
| 43        | Non-infected                     | No                   | Negative              | 0,16                             | Negative                 | 0,00       |
| 44        | Non-infected                     | No                   | Negative              | 0,22                             | Negative                 | 0,00       |
| 45        | Non-infected                     | No                   | Negative              | 0,30                             | Negative                 | 7,40       |
| 46        | Non-infected                     | No                   | Negative              | 0,13                             | Negative                 | 0,00       |

| Sample ID | CSFV Infection strain (Genotype) | Days after infection | FlagDIVA ELISA result | Optical density value (FlagDIVA) | E2-antibody ELISA result | Blocking % |
|-----------|----------------------------------|----------------------|-----------------------|----------------------------------|--------------------------|------------|
| 47        | Margarita (1,4)                  | 6                    | Positive              | 0,58                             | Negative                 | 0,00       |
| 48        | Margarita (1,4)                  | 10                   | Negative              | 0,13                             | Negative                 | 0,00       |
| 49        | Non-infected                     | No                   | Negative              | 0,38                             | Negative                 | -0,46      |
| 50        | Non-infected                     | No                   | Negative              | 0,13                             | Negative                 | 0,00       |
| 51        | Margarita (1,4)                  | 10                   | Negative              | 0,19                             | Negative                 | 0,00       |
| 52        | Margarita (1,4)                  | 6                    | Positive              | 0,66                             | Negative                 | 0,00       |
| 53        | Non-infected                     | No                   | Negative              | 0,13                             | Negative                 | -10,93     |
| 54        | Non-infected                     | No                   | Negative              | 0,10                             | Negative                 | 0,00       |
| 55        | Margarita (1,4)                  | 10                   | Negative              | 0,22                             | Negative                 | 0,00       |
| 56        | Margarita (1,4)                  | 6                    | Positive              | 0,61                             | Negative                 | 0,00       |
| 57        | Non-infected                     | No                   | Negative              | 0,31                             | Negative                 | -10,71     |
| 58        | Non-infected                     | No                   | Negative              | 0,14                             | Negative                 | 0,00       |
| 59        | Margarita (1,4)                  | 13                   | Positive              | 1,66                             | Negative                 | 6,43       |
| 60        | Non-infected                     | No                   | Negative              | 0,17                             | Negative                 | 5,81       |
| 61        | Non-infected                     | No                   | Negative              | 0,07                             | Negative                 | 0,00       |
| 62        | Non-infected                     | No                   | Negative              | 0,33                             | Negative                 | 0,00       |
| 63        | Non-infected                     | No                   | Negative              | 0,25                             | Negative                 | 0,00       |
| 64        | Non-infected                     | No                   | Negative              | 0,31                             | Negative                 | 0,00       |
| 65        | Non-infected                     | No                   | Negative              | 0,29                             | Negative                 | 0,00       |
| 66        | Non-infected                     | No                   | Negative              | 0,09                             | Negative                 | -14,40     |
| 67        | Non-infected                     | No                   | Negative              | 0,10                             | Negative                 | -12,09     |
| 68        | Margarita (1,4)                  | 5                    | Negative              | 0,09                             | Negative                 | 29,65      |
| 69        | Margarita (1,4)                  | 5                    | Negative              | 0,19                             | Negative                 | -16,72     |
| 70        | Non-infected                     | No                   | Negative              | 0,18                             | Negative                 | -7,67      |
| 71        | Margarita (1,4)                  | 5                    | Negative              | 0,16                             | Negative                 | -13,69     |
| 72        | Non-infected                     | No                   | Negative              | 0,05                             | Negative                 | -5,52      |
| 73        | Margarita (1,4)                  | 5                    | Negative              | 0,07                             | Negative                 | -11,87     |
| 74        | Pinar del Rio (1,4)              | 21                   | Negative              | 0,28                             | Negative                 | 6,21       |
| 75        | Non-infected                     | No                   | Negative              | 0,19                             | Negative                 | 0,00       |
| 76        | Non-infected                     | No                   | Negative              | 0,13                             | Negative                 | -7,89      |
| 77        | Pinar del Rio (1,4)              | 15                   | Negative              | 0,18                             | Negative                 | 29,44      |
| 78        | Margarita (1,4)                  | 5                    | Negative              | 0,13                             | Negative                 | -16,50     |
| 79        | Margarita (1,4)                  | 5                    | Negative              | 0,19                             | Negative                 | 11,25      |
| 80        | Non-infected                     | No                   | Negative              | 0,12                             | Negative                 | 0,00       |
| 81        | Pinar del Rio (1,4)              | 15                   | Negative              | 0,14                             | Negative                 | 29,64      |
| 82        | Margarita (1,4)                  | 5                    | Negative              | 0,08                             | Negative                 | -9,33      |
| 83        | Non-infected                     | No                   | Negative              | 0,29                             | Negative                 | 0,00       |
| 84        | Pinar del Rio (1,4)              | 15                   | Negative              | 0,14                             | Negative                 | 8,29       |
| 85        | Pinar del Rio (1,4)              | 22                   | Negative              | 0,26                             | Negative                 | 23,38      |
| 86        | Pinar del Rio (1,4)              | 21                   | Positive              | 0,69                             | Negative                 | 23,38      |
| 87        | Non-infected                     | No                   | Negative              | 0,21                             | Negative                 | 0,00       |
| 88        | Margarita (1,4)                  | 13                   | Negative              | 0,24                             | Negative                 | 0,00       |
| 89        | Pinar del Rio (1,4)              | 15                   | Negative              | 0,22                             | Negative                 | 20,03      |
| 90        | Pinar del Rio (1,4)              | 22                   | Negative              | 0,29                             | Negative                 | 39,32      |
| 91        | Pinar del Rio (1,4)              | 21                   | Positive              | 0,65                             | Negative                 | 39,31      |
| 92        | Margarita (1,4)                  | 13                   | Negative              | 0,25                             | Negative                 | 0,00       |
| 93        | Pinar del Rio (1,4)              | 15                   | Negative              | 0,16                             | Negative                 | 6,43       |
| 94        | Pinar del Rio (1,4)              | 22                   | Negative              | 0,37                             | Negative                 | 32,27      |
| 95        | Pinar del Rio (1,4)              | 21                   | Positive              | 0,73                             | Negative                 | 32,27      |

| Sample ID | CSFV Infection strain (Genotype) | Days after infection | FlagDIVA ELISA result | Optical density value (FlagDIVA) | E2-antibody ELISA result | Blocking % |
|-----------|----------------------------------|----------------------|-----------------------|----------------------------------|--------------------------|------------|
| 96        | Pinar del Rio (1,4)              | 15                   | Negative              | 0,28                             | Negative                 | 22,50      |
| 97        | Non-infected                     | No                   | Negative              | 0,17                             | Negative                 | 0,00       |
| 98        | Pinar del Rio (1,4)              | 15                   | Negative              | 0,16                             | Negative                 | 9,14       |
| 99        | Margarita (1,4)                  | 13                   | Negative              | 0,16                             | Negative                 | 0,00       |
| 100       | Non-infected                     | No                   | Negative              | 0,29                             | Negative                 | 0,00       |
| 101       | Pinar del Rio (1,4)              | 15                   | Negative              | 0,14                             | Negative                 | 19,29      |
| 102       | Pinar del Rio (1,4)              | 15                   | Negative              | 0,15                             | Negative                 | 24,33      |
| 103       | Margarita (1,4)                  | 3                    | Positive              | 0,73                             | Negative                 | 0,00       |
| 104       | Non-infected                     | No                   | Negative              | 0,21                             | Negative                 | 0,00       |
| 105       | Non-infected                     | No                   | Negative              | 0,12                             | Negative                 | 0,00       |
| 106       | Non-infected                     | No                   | Negative              | 0,22                             | Negative                 | 0,00       |
| 107       | Non-infected                     | No                   | Negative              | 0,24                             | Negative                 | 0,00       |
| 108       | Non-infected                     | No                   | Negative              | 0,14                             | Negative                 | 0,00       |
| 109       | Non-infected                     | No                   | Negative              | 0,26                             | Negative                 | 0,00       |
| 110       | Non-infected                     | No                   | Negative              | 0,27                             | Negative                 | 0,00       |
| 111       | Margarita (1,4)                  | 8                    | Positive              | 0,51                             | Negative                 | 14,90      |
| 112       | Margarita (1,4)                  | 8                    | Positive              | 0,41                             | Negative                 | 16,40      |
| 113       | Pinar del Rio (1,4)              | 18                   | Negative              | 0,40                             | Negative                 | 24,74      |
| 114       | Catalonia01 (2,3)                | 14                   | Negative              | 0,27                             | Doubtful                 | 39,84      |
| 115       | Pinar del Rio (1,4)              | 21                   | Positive              | 0,59                             | Doubtful                 | 34,50      |
| 116       | Catalonia01 (2,3)                | 17                   | Negative              | 0,25                             | Doubtful                 | 36,38      |
| 117       | Pinar del Rio (1,4)              | 15                   | Negative              | 0,19                             | Doubtful                 | 33,81      |
| 118       | Margarita (1,4)                  | 13                   | Positive              | 0,95                             | Positive                 | 73,00      |
| 119       | Margarita (1,4)                  | 10                   | Positive              | 0,43                             | Positive                 | 88,00      |
| 120       | Margarita (1,4)                  | 6                    | Positive              | 0,57                             | Positive                 | 62,00      |
| 121       | Pinar del Rio (1,4)              | 21                   | Positive              | 0,42                             | Positive                 | 51,57      |
| 122       | Catalonia01 (2,3)                | 14                   | Positive              | 0,44                             | Positive                 | 61,32      |
| 123       | Margarita (1,4)                  | 10                   | Positive              | 1,23                             | Positive                 | 92,00      |
| 124       | Margarita (1,4)                  | 6                    | Negative              | 0,38                             | Positive                 | 91,00      |
| 125       | Catalonia01 (2,3)                | 17                   | Positive              | 0,48                             | Positive                 | 64,73      |
| 126       | Margarita (1,4)                  | 13                   | Positive              | 1,15                             | Positive                 | 94,00      |
| 127       | Pinar del Rio (1,4)              | 21                   | Positive              | 0,46                             | Positive                 | 45,39      |
| 128       | Margarita (1,4)                  | 6                    | Positive              | 0,50                             | Positive                 | 79,04      |
| 129       | Margarita (1,4)                  | 10                   | Positive              | 0,51                             | Positive                 | 92,00      |
| 130       | Margarita (1,4)                  | 31                   | Positive              | 1,10                             | Positive                 | 49,67      |
| 131       | Margarita (1,4)                  | 13                   | Positive              | 1,32                             | Positive                 | 92,00      |
| 132       | Margarita (1,4)                  | 6                    | Positive              | 0,42                             | Positive                 | 77,00      |
| 133       | Margarita (1,4)                  | 31                   | Positive              | 1,20                             | Positive                 | 57,59      |
| 134       | Catalonia01 (2,3)                | 17                   | Negative              | 0,29                             | Positive                 | 62,18      |
| 135       | Margarita (1,4)                  | 10                   | Negative              | 0,27                             | Positive                 | 93,80      |
| 136       | Catalonia01 (2,3)                | 14                   | Negative              | 0,16                             | Positive                 | 41,47      |
| 137       | Pinar del Rio (1,4)              | 21                   | Positive              | 0,53                             | Positive                 | 69,00      |
| 138       | Margarita (1,4)                  | 6                    | Positive              | 1,68                             | Positive                 | 83,00      |
| 139       | Margarita (1,4)                  | 13                   | Positive              | 2,16                             | Positive                 | 97,00      |
| 140       | Margarita (1,4)                  | 10                   | Positive              | 1,60                             | Positive                 | 89,80      |
| 141       | Catalonia01 (2,3)                | 17                   | Negative              | 0,25                             | Positive                 | 71,84      |
| 142       | Catalonia01 (2,3)                | 14                   | Negative              | 0,17                             | Positive                 | 55,17      |
| 143       | Pinar del Rio (1,4)              | 21                   | Positive              | 0,55                             | Positive                 | 80,42      |
| 144       | Margarita (1,4)                  | 13                   | Positive              | 1,95                             | Positive                 | 96,00      |

| Sample ID | CSFV Infection strain (Genotype) | Days after infection | FlagDIVA ELISA result | Optical density value (FlagDIVA) | E2-antibody ELISA result | Blocking % |
|-----------|----------------------------------|----------------------|-----------------------|----------------------------------|--------------------------|------------|
| 145       | Margarita (1,4)                  | 6                    | Positive              | 1,62                             | Positive                 | 92,00      |
| 146       | Margarita (1,4)                  | 10                   | Positive              | 1,52                             | Positive                 | 94,20      |
| 147       | Catalonia01 (2,3)                | 14                   | Negative              | 0,21                             | Positive                 | 51,75      |
| 148       | Catalonia01 (2,3)                | 17                   | Positive              | 0,46                             | Positive                 | 57,33      |
| 149       | Margarita (1,4)                  | 13                   | Positive              | 1,17                             | Positive                 | 93,55      |
| 150       | Margarita (1,4)                  | 6                    | Positive              | 0,91                             | Positive                 | 74,26      |
| 151       | Margarita (1,4)                  | 10                   | Negative              | 0,38                             | Positive                 | 91,40      |
| 152       | Margarita (1,4)                  | 13                   | Positive              | 1,24                             | Positive                 | 94,70      |
| 153       | Margarita (1,4)                  | 6                    | Positive              | 0,95                             | Positive                 | 84,00      |
| 154       | Margarita (1,4)                  | 10                   | Positive              | 0,95                             | Positive                 | 94,30      |
| 155       | Pinar del Rio (1,4)              | 21                   | Positive              | 0,42                             | Positive                 | 46,91      |
| 156       | Margarita (1,4)                  | 31                   | Positive              | 1,06                             | Positive                 | 54,40      |
| 157       | Margarita (1,4)                  | 12                   | Negative              | 0,39                             | Positive                 | 45,70      |
| 158       | Margarita (1,4)                  | 13                   | Positive              | 1,23                             | Positive                 | 94,62      |
| 159       | Margarita (1,4)                  | 6                    | Positive              | 0,52                             | Positive                 | 89,00      |
| 160       | Margarita (1,4)                  | 10                   | Positive              | 0,80                             | Positive                 | 93,90      |
| 161       | Pinar del Rio (1,4)              | 21                   | Positive              | 0,47                             | Positive                 | 66,40      |
| 162       | Margarita (1,4)                  | 13                   | Positive              | 1,26                             | Positive                 | 94,33      |
| 163       | Margarita (1,4)                  | 10                   | Positive              | 0,96                             | Positive                 | 94,60      |
| 164       | Margarita (1,4)                  | 13                   | Positive              | 0,72                             | Positive                 | 43,00      |
| 165       | C-strain (1,1)                   | 26                   | Negative              | 0,18                             | Positive                 | 50,22      |
| 166       | Margarita (1,4)                  | 12                   | Positive              | 0,45                             | Positive                 | 45,86      |
| 167       | Margarita (1,4)                  | 13                   | Positive              | 0,66                             | Positive                 | 76,79      |
| 168       | Margarita (1,4)                  | 13                   | Positive              | 0,49                             | Positive                 | 65,00      |
| 169       | Margarita (1,4)                  | 13                   | Negative              | 0,24                             | Positive                 | 49,40      |
| 170       | Margarita (1,4)                  | 31                   | Positive              | 0,89                             | Positive                 | 42,46      |
| 171       | Margarita (1,4)                  | 10                   | Negative              | 0,20                             | Positive                 | 66,00      |
| 172       | Margarita (1,4)                  | 13                   | Positive              | 0,55                             | Positive                 | 85,50      |
| 173       | Margarita (1,4)                  | 10                   | Negative              | 0,27                             | Positive                 | 91,00      |
| 174       | Margarita (1,4)                  | 5                    | Positive              | 0,59                             | Positive                 | 58,94      |
| 175       | Margarita (1,4)                  | 10                   | Positive              | 0,42                             | Positive                 | 94,00      |
| 176       | Margarita (1,4)                  | 10                   | Negative              | 0,37                             | Positive                 | 76,00      |
| 177       | Margarita (1,4)                  | 10                   | Positive              | 0,48                             | Positive                 | 93,20      |
| 178       | Margarita (1,4)                  | 10                   | Negative              | 0,38                             | Positive                 | 68,00      |
| 179       | Thiverval                        | 20                   | Negative              | 0,32                             | Positive                 | 46,00      |
| 180       | Margarita (1,4)                  | 10                   | Negative              | 0,32                             | Positive                 | 65,00      |
| 181       | Margarita (1,4)                  | 5                    | Positive              | 0,75                             | Positive                 | 82,51      |
| 182       | Margarita (1,4)                  | 13                   | Positive              | 0,61                             | Positive                 | 72,00      |
| 183       | Margarita (1,4)                  | 13                   | Positive              | 0,15                             | Positive                 | 42,00      |
| 184       | Margarita (1,4)                  | 13                   | Positive              | 0,66                             | Positive                 | 80,00      |
| 185       | Margarita (1,4)                  | 13                   | Positive              | 0,74                             | Positive                 | 74,00      |
| 186       | Margarita (1,4)                  | 13                   | Positive              | 0,86                             | Positive                 | 58,00      |
| 187       | Pinar del Rio (1,4)              | 21                   | Positive              | 1,56                             | Positive                 | 47,46      |
| 188       | Margarita (1,4)                  | 13                   | Positive              | 1,00                             | Positive                 | 72,00      |
| 189       | Margarita (1,4)                  | 6                    | Positive              | 0,41                             | Positive                 | 66,00      |
| 190       | Pinar del Rio (1,4)              | 22                   | Positive              | 0,77                             | Positive                 | 47,46      |
| 191       | Pinar del Rio (1,4)              | 21                   | Positive              | 1,73                             | Positive                 | 40,41      |
| 192       | Margarita (1,4)                  | 13                   | Positive              | 1,37                             | Positive                 | 70,00      |
| 193       | Margarita (1,4)                  | 6                    | Positive              | 0,54                             | Positive                 | 50,00      |

| Sample ID | CSFV Infection strain (Genotype) | Days after infection | FlagDIVA ELISA result | Optical density value (FlagDIVA) | E2-antibody ELISA result | Blocking % |
|-----------|----------------------------------|----------------------|-----------------------|----------------------------------|--------------------------|------------|
| 194       | Pinar del Rio (1,4)              | 22                   | Positive              | 0,86                             | Positive                 | 40,41      |
| 195       | Margarita (1,4)                  | 13                   | Negative              | 0,16                             | Positive                 | 58,56      |
| 196       | Pinar del Rio (1,4)              | 21                   | Positive              | 1,60                             | Positive                 | 42,79      |
| 197       | Pinar del Rio (1,4)              | 22                   | Positive              | 0,97                             | Positive                 | 42,79      |
| 198       | Pinar del Rio (1,4)              | 22                   | Positive              | 0,89                             | Positive                 | 44,98      |
| 199       | Pinar del Rio (1,4)              | 21                   | Positive              | 1,67                             | Positive                 | 44,98      |
| 200       | Pinar del Rio (1,4)              | 22                   | Positive              | 0,64                             | Positive                 | 42,54      |
| 201       | Pinar del Rio (1,4)              | 22                   | Positive              | 0,62                             | Positive                 | 58,09      |
| 202       | Margarita (1,4)                  | 6                    | Positive              | 0,42                             | Positive                 | 85,00      |
| 203       | Margarita (1,4)                  | 6                    | Positive              | 0,56                             | Positive                 | 94,00      |
| 204       | Margarita (1,4)                  | 3                    | Positive              | 0,59                             | Positive                 | 45,00      |
| 205       | Margarita (1,4)                  | 3                    | Positive              | 0,66                             | Positive                 | 43,00      |
| 206       | Margarita (1,4)                  | 6                    | Negative              | 0,29                             | Positive                 | 89,00      |
| 207       | Margarita (1,4)                  | 3                    | Positive              | 0,66                             | Positive                 | 67,00      |
| 208       | Margarita (1,4)                  | 6                    | Negative              | 0,36                             | Positive                 | 89,00      |
| 209       | Margarita (1,4)                  | 3                    | Positive              | 1,03                             | Positive                 | 53,00      |
| 210       | Margarita (1,4)                  | 6                    | Positive              | 0,42                             | Positive                 | 93,00      |
| 211       | Pestivirus                       | Unknown              | Positive              | 1,04                             | Positive                 | Unknown    |
| 212       | Pestivirus                       | Unknown              | Positive              | 2,00                             | Positive                 | Unknown    |
| 213       | Margarita (1,4)                  | 17                   | Positive              | 0,66                             | Positive                 | 67,40      |
| 214       | Margarita (1,4)                  | 17                   | Positive              | 0,62                             | Positive                 | 78,00      |
| 215       | Pinar del Rio (1,4)              | 18                   | Negative              | 0,37                             | Positive                 | 41,99      |
| 216       | Catalonia01 (2,3)                | 28                   | Positive              | 0,94                             | Positive                 | 79,19      |
| 217       | Catalonia01 (2,3)                | Unknown              | Positive              | 0,44                             | Positive                 | 61,24      |
